# Supplementary material for: A new voxel-based model for the determination of atmospheric weighted mean temperature in GPS atmospheric sounding
Source: Copernicus journal article supplement (doi:10.5194/amt-10-2045-2017), 2017-06-07
Supplement: Supplementary file [file amt-10-2045-2017-supplement-title-page.pdf › amt-10-2045-2017-supplement-title-page.pdf]

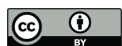

## *Supplement of*

# **A new voxel-based model for the determination of atmospheric weighted mean temperature in GPS atmospheric sounding**

**Changyong He et al.**

*Correspondence to:* Kefei Zhang (kefei.zhang@rmit.edu.au, profkzhang@cumt.edu.cn)

- amt-10-2045-2017-supplement-title-page.pdf
- grid\_parameters.mat
- gwmt\_d.m

The copyright of individual parts of the supplement might differ from the CC BY 3.0 License.
